# Supplementary material
Source: Springer Nature journal article supplement (https://www.springermedizin.de/resource/supplementary/12874_2007_202_MOESM2_ESM.pdf/9433978)

### GHQ-12 polytomous coding

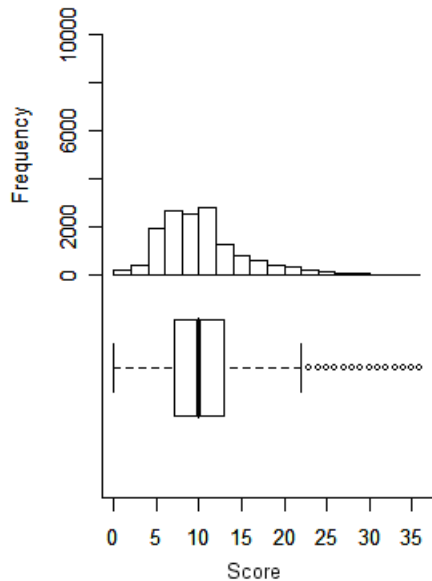

### GHQ-12 dichotomous coding

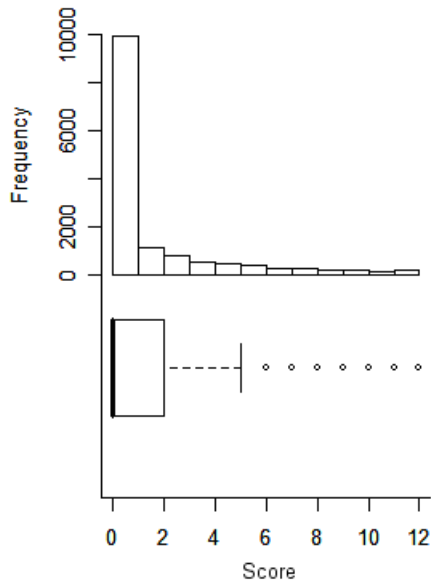

Supplement: MOESM2 [file 9433978]
